# Supplementary material
Source: publisher figshare collection journal article supplement (https://acs.figshare.com/ndownloader/files/4121725)
Supplement: Supplementary file 1 [file 4121725]

data_7816sadabs
_publ_requested_journal          'test 7816'

_publ_section_title              
;
? Title
;

loop_
_publ_author_name
_publ_author_address

'Javier Carreras'
;     Max-Planck-Institut f\"ur Kohlenforschung
      Kaiser-Wilhelm-Platz 1
      45470 M\"ulheim an der Ruhr
      Germany
;
'Manuel Alcarazo'
;     Max-Planck-Institut f\"ur Kohlenforschung
      Kaiser-Wilhelm-Platz 1
      45470 M\"ulheim an der Ruhr
      Germany
;
'J\"org Rust'
;     Max-Planck-Institut f\"ur Kohlenforschung
      Kaiser-Wilhelm-Platz 1
      45470 M\"ulheim an der Ruhr
      Germany
;
'Christian W. Lehmann'
;     Max-Planck-Institut f\"ur Kohlenforschung
      Kaiser-Wilhelm-Platz 1
      45470 M\"ulheim an der Ruhr
      Germany
;
_audit_block_code                CSJ-CA-418-11
_audit_creation_date             2012-05-23
_audit_creation_method           
;
  Olex2 1.1
  (compiled 2011.11.01 svn.r2039, GUI svn.r3906)
;
_publ_contact_author_address     ?
_publ_contact_author_email       ?
_publ_contact_author_phone       ?
_chemical_name_common            ?
_chemical_name_systematic        
;
 Title
;
_chemical_compound_source        ethanole
_chemical_formula_moiety         'C23 H13 F3'
_chemical_formula_sum            'C23 H13 F3'
_chemical_formula_weight         346.33

_chemical_melting_point          ?
loop_
_atom_type_symbol
_atom_type_description
_atom_type_scat_dispersion_real
_atom_type_scat_dispersion_imag
_atom_type_scat_source
C C 0.0033 0.0016 'International Tables Vol C Tables 4.2.6.8 and 6.1.1.4'
H H 0.0000 0.0000 'International Tables Vol C Tables 4.2.6.8 and 6.1.1.4'
F F 0.0171 0.0103 'International Tables Vol C Tables 4.2.6.8 and 6.1.1.4'

_symmetry_cell_setting           MONOCLINIC
_symmetry_space_group_name_H-M   'P 21/c'
_symmetry_space_group_name_Hall  '-p 2ybc'
_symmetry_Int_Tables_number      14

_space_group_crystal_system      monoclinic
_space_group_IT_number           14
_space_group_name_H-M_alt        'P 1 21/c 1'
_space_group_name_Hall           '-P 2ybc'

loop_
_space_group_symop_id
_space_group_symop_operation_xyz
1 'x, y, z'
2 '-x, y+1/2, -z+1/2'
3 '-x, -y, -z'
4 'x, -y-1/2, z-1/2'

_cell_length_a                   12.0407(14)
_cell_length_b                   11.2123(12)
_cell_length_c                   11.8610(16)
_cell_angle_alpha                90.00
_cell_angle_beta                 106.890(11)
_cell_angle_gamma                90.00
_cell_volume                     1532.2(3)
_cell_formula_units_Z            4
_cell_measurement_reflns_used    19236


_cell_measurement_temperature    100
_cell_measurement_theta_max      33.0812
_cell_measurement_theta_min      2.7933
_exptl_absorpt_coefficient_mu    0.112
_exptl_absorpt_correction_T_max  0.99317
_exptl_absorpt_correction_T_min  0.98591

_exptl_absorpt_correction_type   gaussian
_exptl_absorpt_process_details   'SADABS (Bruker AXS, 2008)'
_exptl_crystal_colour            colourless
_exptl_crystal_density_diffrn    1.501
_exptl_crystal_density_meas      ?
_exptl_crystal_density_method    ?

loop_
_exptl_crystal_face_index_h
_exptl_crystal_face_index_k
_exptl_crystal_face_index_l
_exptl_crystal_face_perp_dist
2.00 -1.00 -1.00 0.0350
-2.00 1.00 1.00 0.0350
-1.00 -1.00 0.00 0.0400
1.00 1.00 0.00 0.0400
-1.00 -1.00 5.00 0.0700
1.00 1.00 -5.00 0.0700

_exptl_crystal_description       block
_exptl_crystal_F_000             712
_exptl_crystal_size_max          0.14
_exptl_crystal_size_mid          0.08
_exptl_crystal_size_min          0.07
_exptl_special_details           
;
 Crystal mounted on a MiTeGen loop using Perfluoropolyether PFO-XR75
;
_diffrn_reflns_av_R_equivalents  0.0698
_diffrn_reflns_av_unetI/netI     0.1068
_diffrn_reflns_limit_h_max       17
_diffrn_reflns_limit_h_min       -17
_diffrn_reflns_limit_k_max       16
_diffrn_reflns_limit_k_min       -15
_diffrn_reflns_limit_l_max       17
_diffrn_reflns_limit_l_min       -16
_diffrn_reflns_number            16304
_diffrn_reflns_theta_full        27.50
_diffrn_reflns_theta_max         32.03
_diffrn_reflns_theta_min         2.79

_diffrn_ambient_temperature      100
_diffrn_detector_area_resol_mean 18.02
_diffrn_measured_fraction_theta_full 0.997
_diffrn_measured_fraction_theta_max 0.994
_diffrn_measurement_device_type  'Bruker AXS Enraf-Nonius KappaCCD'
_diffrn_measurement_method       'CCD \f- and \w-scans'
_diffrn_radiation_monochromator  graphite
_diffrn_radiation_type           MoK\a
_diffrn_radiation_wavelength     0.71073
_diffrn_radiation_source         '0.2 x 2mm^2^ focus rotating anode'
_reflns_number_gt                3075
_reflns_number_total             5309
_reflns_threshold_expression     >2sigma(I)
_computing_cell_refinement       'DENZO (Bruker AXS, 2006)'

_computing_data_collection       'DATCOL (Bruker AXS, 2006)'
_computing_data_reduction        'DENZO (Bruker AXS, 2006)'
_computing_molecular_graphics    'DIAMOND (Crystal Impact GbR, 2005)'
_computing_publication_material  
;
O. V. Dolomanov, L. J. Bourhis, R. J. Gildea, J. A. K. Howard and H. Puschmann,
OLEX2: a complete structure solution, refinement and analysis program.
J. Appl. Cryst. (2009). 42, 339-341.
;
_computing_structure_refinement  'SHELXL-97 (Sheldrick, 2008)'
_computing_structure_solution    'SHELXS-97 (Sheldrick, 2008)'
_refine_diff_density_max         0.448
_refine_diff_density_min         -0.363
_refine_diff_density_rms         0.081
_refine_ls_extinction_coef       ?
_refine_ls_extinction_method     none
_refine_ls_goodness_of_fit_ref   1.076
_refine_ls_hydrogen_treatment    constr
_refine_ls_matrix_type           full
_refine_ls_number_parameters     235
_refine_ls_number_reflns         5309
_refine_ls_number_restraints     0
_refine_ls_R_factor_all          0.1466
_refine_ls_R_factor_gt           0.0704
_refine_ls_restrained_S_all      1.076
_refine_ls_shift/su_max          0.000
_refine_ls_shift/su_mean         0.000
_refine_ls_structure_factor_coef Fsqd
_refine_ls_weighting_details     
'calc w=1/[\s^2^(Fo^2^)+(0.0495P)^2^+0.6626P] where P=(Fo^2^+2Fc^2^)/3'
_refine_ls_weighting_scheme      calc
_refine_ls_wR_factor_gt          0.1242
_refine_ls_wR_factor_ref         0.1510

_refine_special_details          
;
 Refinement of F^2^ against ALL reflections.  The weighted R-factor wR and
 goodness of fit S are based on F^2^, conventional R-factors R are based
 on F, with F set to zero for negative F^2^. The threshold expression of
 F^2^ > 2sigma(F^2^) is used only for calculating R-factors(gt) etc. and is
 not relevant to the choice of reflections for refinement.  R-factors based
 on F^2^ are statistically about twice as large as those based on F, and R-
 factors based on ALL data will be even larger.

 The minimum and maximum estimated transmissions from the multi-scan
 scaling are 0.8949 and 1.0000 (SADABS).

Highest peak        ?
Deepest hole        ?
;
_atom_sites_solution_hydrogens   geom
_atom_sites_solution_primary     direct
_atom_sites_solution_secondary   difmap

loop_
_atom_site_label
_atom_site_type_symbol
_atom_site_fract_x
_atom_site_fract_y
_atom_site_fract_z
_atom_site_U_iso_or_equiv
_atom_site_adp_type
_atom_site_occupancy
_atom_site_symmetry_multiplicity
_atom_site_calc_flag
_atom_site_refinement_flags
_atom_site_disorder_assembly
_atom_site_disorder_group
F1 F 0.48181(13) 0.75428(12) 0.64967(12) 0.0348(4) Uani 1 1 d . . .
F2 F 0.37842(11) 0.68507(12) 0.75437(13) 0.0299(3) Uani 1 1 d . . .
F3 F 0.54667(11) 0.61331(12) 0.77283(13) 0.0325(4) Uani 1 1 d . . .
C1 C 0.39790(16) 0.56322(17) 0.60006(18) 0.0141(4) Uani 1 1 d . . .
C2 C 0.37044(16) 0.44935(18) 0.63521(18) 0.0145(4) Uani 1 1 d . . .
H2 H 0.3882 0.4306 0.7149 0.017 Uiso 1 1 calc R . .
C3 C 0.31759(16) 0.36622(17) 0.55184(18) 0.0141(4) Uani 1 1 d . . .
H3 H 0.3010 0.2912 0.5762 0.017 Uiso 1 1 calc R . .
C4 C 0.28751(15) 0.39177(17) 0.42936(18) 0.0123(4) Uani 1 1 d . . .
C5 C 0.22764(15) 0.30856(17) 0.33811(18) 0.0123(4) Uani 1 1 d . . .
C6 C 0.22454(16) 0.17971(17) 0.35833(18) 0.0128(4) Uani 1 1 d . . .
C7 C 0.31183(17) 0.12064(18) 0.44607(19) 0.0164(4) Uani 1 1 d . . .
H7 H 0.3738 0.1645 0.4927 0.020 Uiso 1 1 calc R . .
C8 C 0.30744(18) -0.00051(18) 0.46436(19) 0.0189(4) Uani 1 1 d . . .
H8 H 0.3664 -0.0378 0.5221 0.023 Uiso 1 1 calc R . .
C9 C 0.21409(19) -0.06690(19) 0.39577(19) 0.0200(5) Uani 1 1 d . . .
H9 H 0.2078 -0.1476 0.4111 0.024 Uiso 1 1 calc R . .
C10 C 0.13139(18) -0.01246(18) 0.30534(19) 0.0177(4) Uani 1 1 d . . .
H10 H 0.0707 -0.0579 0.2587 0.021 Uiso 1 1 calc R . .
C11 C 0.13606(16) 0.10985(17) 0.28143(18) 0.0134(4) Uani 1 1 d . . .
C12 C 0.06085(15) 0.16289(18) 0.17335(18) 0.0135(4) Uani 1 1 d . . .
C13 C -0.03125(16) 0.09959(18) 0.09636(19) 0.0162(4) Uani 1 1 d . . .
H13 H -0.0546 0.0274 0.1208 0.019 Uiso 1 1 calc R . .
C14 C -0.08746(16) 0.14205(19) -0.01404(19) 0.0190(4) Uani 1 1 d . . .
H14 H -0.1482 0.0988 -0.0635 0.023 Uiso 1 1 calc R . .
C15 C -0.05345(17) 0.24983(19) -0.05202(19) 0.0186(4) Uani 1 1 d . . .
H15 H -0.0880 0.2762 -0.1285 0.022 Uiso 1 1 calc R . .
C16 C 0.03166(16) 0.31731(18) 0.02424(18) 0.0160(4) Uani 1 1 d . . .
H16 H 0.0521 0.3905 -0.0009 0.019 Uiso 1 1 calc R . .
C17 C 0.08840(15) 0.27778(17) 0.13948(17) 0.0128(4) Uani 1 1 d . . .
C18 C 0.17082(15) 0.35256(17) 0.22554(17) 0.0122(4) Uani 1 1 d . . .
C19 C 0.19107(16) 0.47315(17) 0.19725(18) 0.0143(4) Uani 1 1 d . . .
H19 H 0.1550 0.5018 0.1219 0.017 Uiso 1 1 calc R . .
C20 C 0.26137(16) 0.54648(18) 0.27740(18) 0.0155(4) Uani 1 1 d . . .
H20 H 0.2793 0.6216 0.2543 0.019 Uiso 1 1 calc R . .
C21 C 0.30796(15) 0.51005(17) 0.39617(18) 0.0122(4) Uani 1 1 d . . .
C22 C 0.36714(16) 0.59303(17) 0.48334(19) 0.0142(4) Uani 1 1 d . . .
H22 H 0.3851 0.6683 0.4608 0.017 Uiso 1 1 calc R . .
C23 C 0.45143(17) 0.65323(18) 0.69274(19) 0.0163(4) Uani 1 1 d . . .

loop_
_atom_site_aniso_label
_atom_site_aniso_U_11
_atom_site_aniso_U_22
_atom_site_aniso_U_33
_atom_site_aniso_U_23
_atom_site_aniso_U_13
_atom_site_aniso_U_12
F1 0.0530(9) 0.0254(7) 0.0233(8) -0.0045(6) 0.0070(7) -0.0220(7)
F2 0.0284(7) 0.0286(7) 0.0372(9) -0.0167(6) 0.0167(6) -0.0024(6)
F3 0.0253(7) 0.0338(8) 0.0264(8) -0.0131(6) -0.0114(6) 0.0094(6)
C1 0.0109(8) 0.0149(9) 0.0150(10) -0.0014(8) 0.0016(7) 0.0011(7)
C2 0.0144(9) 0.0173(10) 0.0105(10) 0.0026(8) 0.0013(7) 0.0013(8)
C3 0.0165(9) 0.0108(9) 0.0137(10) 0.0018(8) 0.0025(8) 0.0006(7)
C4 0.0110(8) 0.0141(9) 0.0113(10) 0.0030(7) 0.0024(7) 0.0015(7)
C5 0.0109(8) 0.0128(9) 0.0126(10) 0.0009(8) 0.0028(7) -0.0004(7)
C6 0.0154(9) 0.0119(9) 0.0120(10) 0.0003(8) 0.0051(7) -0.0007(7)
C7 0.0176(9) 0.0179(10) 0.0130(10) 0.0012(8) 0.0033(8) 0.0001(8)
C8 0.0246(10) 0.0169(10) 0.0143(11) 0.0048(9) 0.0042(8) 0.0047(9)
C9 0.0317(11) 0.0121(9) 0.0191(12) 0.0013(8) 0.0120(9) -0.0003(9)
C10 0.0213(10) 0.0167(10) 0.0162(11) -0.0029(8) 0.0073(8) -0.0035(8)
C11 0.0155(8) 0.0140(9) 0.0122(10) -0.0012(8) 0.0066(7) -0.0019(7)
C12 0.0127(8) 0.0158(9) 0.0131(10) -0.0023(8) 0.0054(7) -0.0006(7)
C13 0.0150(9) 0.0160(10) 0.0187(11) -0.0047(8) 0.0066(8) -0.0018(7)
C14 0.0130(9) 0.0230(11) 0.0194(11) -0.0091(9) 0.0021(8) -0.0011(8)
C15 0.0163(9) 0.0225(11) 0.0144(11) -0.0025(9) 0.0001(8) 0.0045(8)
C16 0.0161(9) 0.0163(10) 0.0143(11) -0.0004(8) 0.0026(8) 0.0021(8)
C17 0.0104(8) 0.0162(10) 0.0114(10) -0.0018(8) 0.0024(7) 0.0023(7)
C18 0.0114(8) 0.0135(9) 0.0118(10) -0.0008(8) 0.0035(7) -0.0010(7)
C19 0.0151(9) 0.0149(10) 0.0116(10) 0.0040(8) 0.0020(7) 0.0007(7)
C20 0.0170(9) 0.0129(9) 0.0155(11) 0.0035(8) 0.0029(8) -0.0010(7)
C21 0.0099(8) 0.0125(9) 0.0132(10) 0.0011(8) 0.0019(7) -0.0004(7)
C22 0.0117(8) 0.0125(9) 0.0175(11) 0.0014(8) 0.0026(7) 0.0002(7)
C23 0.0162(9) 0.0157(10) 0.0154(11) -0.0021(8) 0.0022(8) 0.0012(8)

_geom_special_details            
;
 All esds (except the esd in the dihedral angle between two l.s. planes) 
 are estimated using the full covariance matrix.  The cell esds are taken 
 into account individually in the estimation of esds in distances, angles 
 and torsion angles; correlations between esds in cell parameters are only 
 used when they are defined by crystal symmetry.  An approximate (isotropic) 
 treatment of cell esds is used for estimating esds involving l.s. planes. 
;
loop_
_geom_bond_atom_site_label_1
_geom_bond_atom_site_label_2
_geom_bond_distance
_geom_bond_site_symmetry_2
_geom_bond_publ_flag
F1 C23 1.337(2) . ?
F2 C23 1.345(2) . ?
F3 C23 1.336(2) . ?
C1 C2 1.412(3) . ?
C1 C22 1.367(3) . ?
C1 C23 1.493(3) . ?
C2 C3 1.373(3) . ?
C3 C4 1.421(3) . ?
C4 C5 1.452(3) . ?
C4 C21 1.425(3) . ?
C5 C6 1.467(3) . ?
C5 C18 1.401(3) . ?
C6 C7 1.411(3) . ?
C6 C11 1.420(3) . ?
C7 C8 1.379(3) . ?
C8 C9 1.396(3) . ?
C9 C10 1.376(3) . ?
C10 C11 1.405(3) . ?
C11 C12 1.464(3) . ?
C12 C13 1.407(3) . ?
C12 C17 1.417(3) . ?
C13 C14 1.373(3) . ?
C14 C15 1.392(3) . ?
C15 C16 1.379(3) . ?
C16 C17 1.410(3) . ?
C17 C18 1.463(3) . ?
C18 C19 1.431(3) . ?
C19 C20 1.352(3) . ?
C20 C21 1.417(3) . ?
C21 C22 1.419(3) . ?

loop_
_geom_angle_atom_site_label_1
_geom_angle_atom_site_label_2
_geom_angle_atom_site_label_3
_geom_angle
_geom_angle_site_symmetry_1
_geom_angle_site_symmetry_3
_geom_angle_publ_flag
C2 C1 C23 118.80(18) . . ?
C22 C1 C2 120.16(19) . . ?
C22 C1 C23 120.82(18) . . ?
C3 C2 C1 120.03(19) . . ?
C2 C3 C4 121.77(18) . . ?
C3 C4 C5 123.81(17) . . ?
C3 C4 C21 117.19(18) . . ?
C21 C4 C5 118.71(18) . . ?
C4 C5 C6 122.81(18) . . ?
C18 C5 C4 118.90(17) . . ?
C18 C5 C6 118.29(18) . . ?
C7 C6 C5 122.28(18) . . ?
C7 C6 C11 118.29(18) . . ?
C11 C6 C5 119.23(18) . . ?
C8 C7 C6 121.6(2) . . ?
C7 C8 C9 119.7(2) . . ?
C10 C9 C8 119.70(19) . . ?
C9 C10 C11 121.9(2) . . ?
C6 C11 C12 119.75(18) . . ?
C10 C11 C6 118.39(19) . . ?
C10 C11 C12 121.50(19) . . ?
C13 C12 C11 122.27(18) . . ?
C13 C12 C17 118.68(19) . . ?
C17 C12 C11 118.78(17) . . ?
C14 C13 C12 121.43(19) . . ?
C13 C14 C15 119.99(19) . . ?
C16 C15 C14 119.8(2) . . ?
C15 C16 C17 121.4(2) . . ?
C12 C17 C18 119.36(18) . . ?
C16 C17 C12 118.24(18) . . ?
C16 C17 C18 122.37(18) . . ?
C5 C18 C17 120.49(17) . . ?
C5 C18 C19 119.13(18) . . ?
C19 C18 C17 120.34(18) . . ?
C20 C19 C18 121.61(19) . . ?
C19 C20 C21 120.66(18) . . ?
C20 C21 C4 119.52(18) . . ?
C20 C21 C22 120.36(18) . . ?
C22 C21 C4 119.95(18) . . ?
C1 C22 C21 120.58(18) . . ?
F1 C23 F2 106.11(16) . . ?
F1 C23 C1 113.51(17) . . ?
F2 C23 C1 111.66(16) . . ?
F3 C23 F1 106.38(16) . . ?
F3 C23 F2 105.31(17) . . ?
F3 C23 C1 113.25(17) . . ?


_iucr_refine_instructions_details 
;
TITL 7816sadabs in P21/c #14
CELL 0.71073 12.0407 11.2123 11.861 90 106.89 90
ZERR 4 0.0014 0.0012 0.0016 0 0.011 0
LATT 1
SYMM -X,0.5+Y,0.5-Z
 
SFAC C H F
UNIT 92 52 12
 
L.S. 10
PLAN  20
REM reset to P21/c #14
BOND
fmap 2
acta 55
REM <HKL>Y:/7816/7816sadabs.hkl</HKL>
 
WGHT    0.049500    0.662600
FVAR       0.25829
F1    3    0.481810    0.754279    0.649671    11.00000    0.05304    0.02539 =
         0.02329   -0.00449    0.00699   -0.02198
F2    3    0.378423    0.685073    0.754372    11.00000    0.02841    0.02865 =
         0.03722   -0.01668    0.01671   -0.00243
F3    3    0.546669    0.613312    0.772834    11.00000    0.02534    0.03383 =
         0.02637   -0.01310   -0.01135    0.00938
C1    1    0.397899    0.563225    0.600061    11.00000    0.01092    0.01487 =
         0.01500   -0.00140    0.00160    0.00113
C2    1    0.370440    0.449346    0.635209    11.00000    0.01438    0.01731 =
         0.01046    0.00264    0.00134    0.00129
AFIX  43
H2    2    0.388152    0.430627    0.714855    11.00000   -1.20000
AFIX   0
C3    1    0.317592    0.366218    0.551845    11.00000    0.01650    0.01083 =
         0.01367    0.00181    0.00249    0.00059
AFIX  43
H3    2    0.301048    0.291168    0.576229    11.00000   -1.20000
AFIX   0
C4    1    0.287510    0.391775    0.429355    11.00000    0.01096    0.01412 =
         0.01127    0.00302    0.00241    0.00151
C5    1    0.227642    0.308557    0.338115    11.00000    0.01094    0.01283 =
         0.01264    0.00090    0.00278   -0.00041
C6    1    0.224542    0.179707    0.358331    11.00000    0.01545    0.01186 =
         0.01195    0.00025    0.00514   -0.00066
C7    1    0.311829    0.120636    0.446067    11.00000    0.01764    0.01789 =
         0.01301    0.00117    0.00334    0.00008
AFIX  43
H7    2    0.373836    0.164469    0.492695    11.00000   -1.20000
AFIX   0
C8    1    0.307439   -0.000510    0.464364    11.00000    0.02458    0.01690 =
         0.01429    0.00476    0.00421    0.00468
AFIX  43
H8    2    0.366376   -0.037781    0.522110    11.00000   -1.20000
AFIX   0
C9    1    0.214089   -0.066902    0.395772    11.00000    0.03174    0.01210 =
         0.01915    0.00129    0.01198   -0.00032
AFIX  43
H9    2    0.207800   -0.147571    0.411108    11.00000   -1.20000
AFIX   0
C10   1    0.131388   -0.012456    0.305339    11.00000    0.02126    0.01667 =
         0.01620   -0.00292    0.00726   -0.00346
AFIX  43
H10   2    0.070688   -0.057926    0.258733    11.00000   -1.20000
AFIX   0
C11   1    0.136059    0.109849    0.281434    11.00000    0.01550    0.01403 =
         0.01225   -0.00121    0.00663   -0.00188
C12   1    0.060854    0.162889    0.173354    11.00000    0.01265    0.01578 =
         0.01306   -0.00228    0.00543   -0.00060
C13   1   -0.031245    0.099588    0.096362    11.00000    0.01499    0.01595 =
         0.01874   -0.00475    0.00662   -0.00183
AFIX  43
H13   2   -0.054556    0.027409    0.120786    11.00000   -1.20000
AFIX   0
C14   1   -0.087457    0.142050   -0.014041    11.00000    0.01297    0.02302 =
         0.01942   -0.00906    0.00212   -0.00109
AFIX  43
H14   2   -0.148248    0.098825   -0.063457    11.00000   -1.20000
AFIX   0
C15   1   -0.053447    0.249827   -0.052019    11.00000    0.01627    0.02246 =
         0.01439   -0.00248    0.00007    0.00449
AFIX  43
H15   2   -0.087992    0.276225   -0.128534    11.00000   -1.20000
AFIX   0
C16   1    0.031662    0.317312    0.024240    11.00000    0.01609    0.01633 =
         0.01432   -0.00045    0.00261    0.00212
AFIX  43
H16   2    0.052080    0.390485   -0.000881    11.00000   -1.20000
AFIX   0
C17   1    0.088403    0.277779    0.139479    11.00000    0.01038    0.01616 =
         0.01138   -0.00184    0.00235    0.00233
C18   1    0.170819    0.352557    0.225540    11.00000    0.01140    0.01348 =
         0.01182   -0.00081    0.00352   -0.00103
C19   1    0.191069    0.473149    0.197254    11.00000    0.01511    0.01487 =
         0.01160    0.00403    0.00204    0.00071
AFIX  43
H19   2    0.154997    0.501790    0.121908    11.00000   -1.20000
AFIX   0
C20   1    0.261369    0.546480    0.277397    11.00000    0.01699    0.01290 =
         0.01547    0.00350    0.00291   -0.00098
AFIX  43
H20   2    0.279310    0.621573    0.254314    11.00000   -1.20000
AFIX   0
C21   1    0.307960    0.510053    0.396171    11.00000    0.00989    0.01254 =
         0.01316    0.00114    0.00194   -0.00037
C22   1    0.367138    0.593027    0.483342    11.00000    0.01167    0.01247 =
         0.01746    0.00136    0.00262    0.00017
AFIX  43
H22   2    0.385139    0.668339    0.460836    11.00000   -1.20000
AFIX   0
C23   1    0.451428    0.653230    0.692740    11.00000    0.01623    0.01571 =
         0.01545   -0.00206    0.00220    0.00115
HKLF 4
 
REM  7816sadabs in P21/c #14
REM R1 =  0.0704 for   3075 Fo > 4sig(Fo)  and  0.1466 for all   5309 data
REM    235 parameters refined using      0 restraints
 
END  
     
WGHT      0.0495      0.6626 
REM Highest difference peak  0.448,  deepest hole -0.363,  1-sigma level  0.081
Q1    1   0.1857  0.1472  0.3130  11.00000  0.05    0.45
Q2    1   0.1033  0.1571  0.2364  11.00000  0.05    0.40
Q3    1   0.3034  0.3801  0.4883  11.00000  0.05    0.37
Q4    1   0.2358  0.2453  0.3547  11.00000  0.05    0.37
Q5    1   0.4192  0.6022  0.6519  11.00000  0.05    0.37
Q6    1   0.1435  0.3058  0.1901  11.00000  0.05    0.36
Q7    1   0.3403  0.4209  0.5797  11.00000  0.05    0.36
Q8    1   0.3141  0.4389  0.4140  11.00000  0.05    0.36
Q9    1   0.1872  0.3384  0.2818  11.00000  0.05    0.35
Q10   1   0.0822  0.1057  0.2162  11.00000  0.05    0.34
Q11   1   0.0388  0.2873  0.0848  11.00000  0.05    0.34
Q12   1  -0.0265  0.0207  0.0793  11.00000  0.05    0.34
Q13   1   0.2590  0.3576  0.3765  11.00000  0.05    0.33
Q14   1   0.0630  0.2317  0.1686  11.00000  0.05    0.31
Q15   1   0.1679  0.4173  0.2188  11.00000  0.05    0.31
Q16   1   0.1832  0.3995  0.2043  11.00000  0.05    0.30
Q17   1   0.2361  0.4952  0.2454  11.00000  0.05    0.30
Q18   1  -0.0171  0.2802 -0.0030  11.00000  0.05    0.29
Q19   1  -0.1742  0.0772 -0.1231  11.00000  0.05    0.29
Q20   1   0.3568  0.5161  0.6193  11.00000  0.05    0.28
;
